# Supplementary material for: The preparation of hybrid silicon quantum dots by one-step synthesis for tetracycline detection and antibacterial applications
Source: Royal Society of Chemistry journal article supplement (doi:10.1039/d2ay02102a), 2023-01-01
Supplement: d2ay02102a1.pdf [file d2ay02102a1.pdf]

**Electronic Supplementary Information (ESI)**

**Preparation of hybrid silicon quantum dots by one-step  
synthesis for tetracycline detection and antibacterial  
applications**

Yuting Chi,<sup>ab</sup> Wanlin Sun,<sup>ab</sup> Lijia Zhou,<sup>ab</sup> Shuchen Pei,<sup>ab</sup> Haichun Zeng,<sup>ab</sup> Yuning  
Cheng,<sup>\*c</sup> Shuiqin Chai<sup>\*ab</sup>

*<sup>a</sup> Chongqing Key Laboratory of Industrial Fermentation Microorganism, Chongqing University of  
Science and Technology, Chongqing 401331, P. R. China.*

*<sup>b</sup> College of Chemistry and Chemical Engineering, Chongqing University of Science and  
Technology, Chongqing 401331, P. R. China*

*<sup>c</sup> Fujian Key Laboratory on Conservation and Sustainable Utilization of Marine Biodiversity,  
Fuzhou Institute of Oceanography, Minjiang University, Fuzhou 350108, P. R. China.*

---

*\* Corresponding author. Tel: 86-23-65022211; E-mail addresses: chaisq0104@cqust.edu.cn,  
2680@mju.edu.cn.*

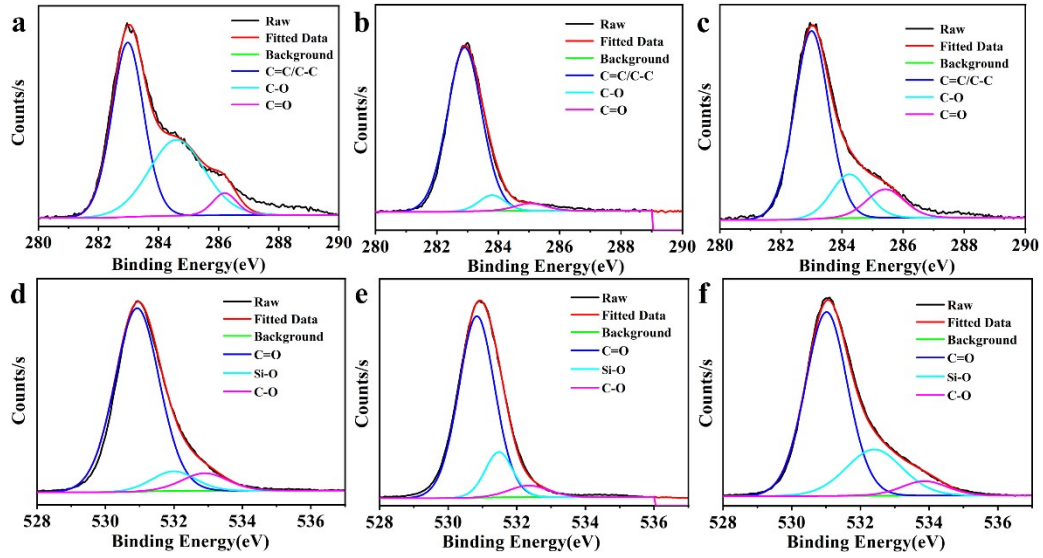

**Fig. S1** The high-resolution C 1s (a-c), O 1s (d-f) XPS spectra of SiQDs-1 (a, c), SiQDs-2 (b, e) and SiQDs-3 (c, f).

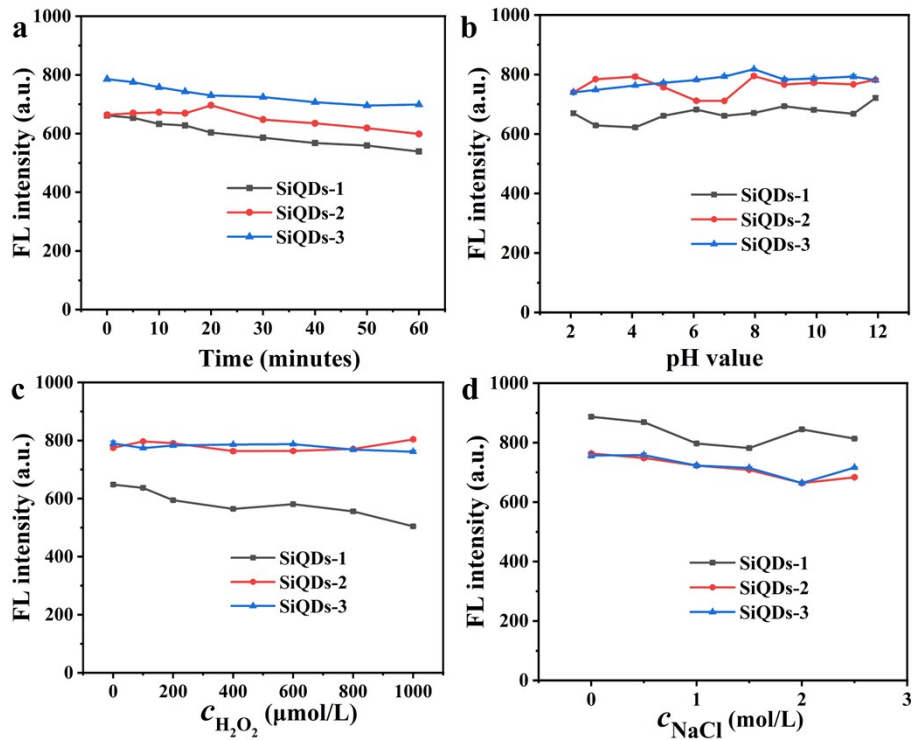

**Fig. S2** Fluorescent spectra of SiQDs in different incubation time (a), different concentration of pH solutions (b) and  $\text{H}_2\text{O}_2$  (c), NaCl (d).

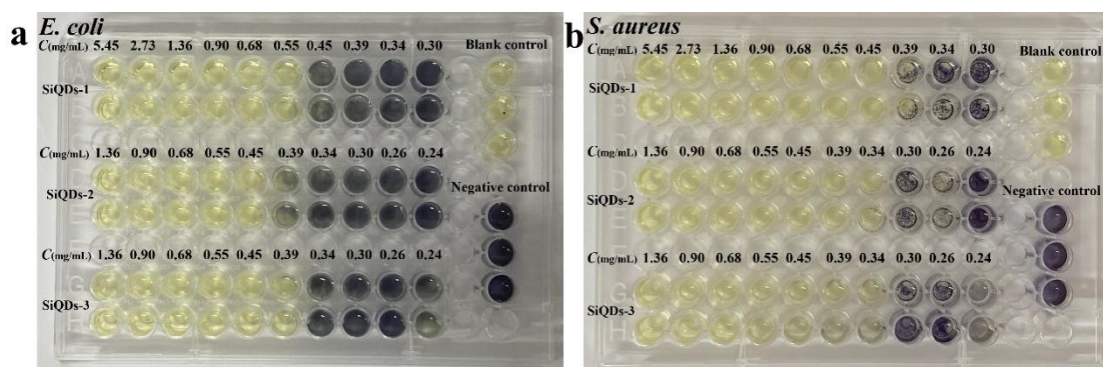

**Fig. S3** The antibacterial ability of SiQDs-1, SiQDs-2 and SiQDs-3 on *E. coli* (a) and *S. aureus* (b).

**Table S1.** OD values of *E. coli* treated with different concentrations of SiQDs-1, SiQDs-2, SiQDs-3 in Fig. S3.

| $C_{\text{SiQDs}}$<br>(mg/mL) | 5.45  | 2.73  | 1.36  | 0.90  | 0.68  | 0.55  | 0.45  | 0.39  | 0.34  | 0.30  | 0.26  | 0.24  | Blank group    |
|-------------------------------|-------|-------|-------|-------|-------|-------|-------|-------|-------|-------|-------|-------|----------------|
|                               |       |       |       |       |       |       |       |       |       |       |       |       | 0.059          |
| SiQDs-1                       | 0.044 | 0.049 | 0.046 | 0.048 | 0.049 | 0.054 | 0.194 | 0.303 | 0.411 | 0.473 |       |       | 0.055          |
|                               | 0.038 | 0.045 | 0.043 | 0.045 | 0.048 | 0.065 | 0.148 | 0.265 | 0.349 | 0.422 |       |       | 0.064          |
| SiQDs-2                       |       |       | 0.042 | 0.048 | 0.046 | 0.048 | 0.061 | 0.164 | 0.279 | 0.345 | 0.352 | 0.459 | Negative group |
|                               |       |       | 0.037 | 0.043 | 0.041 | 0.044 | 0.058 | 0.136 | 0.243 | 0.352 | 0.307 | 0.43  | 0.663          |
| SiQDs-3                       |       |       | 0.033 | 0.042 | 0.037 | 0.041 | 0.051 | 0.072 | 0.22  | 0.404 | 0.491 | 0.24  | 0.651          |
|                               |       |       | 0.061 | 0.062 | 0.067 | 0.076 | 0.078 | 0.088 | 0.265 | 0.3   | 0.439 | 0.164 | 0.656          |

**Table S2.** OD values of *S. aureus* treated with different concentrations of SiQDs-1, SiQDs-2, SiQDs-3 in Fig. S3.

| $C_{\text{SiQDs}}$<br>(mg/mL) | 5.45  | 2.73  | 1.36  | 0.90  | 0.68  | 0.55  | 0.45  | 0.39  | 0.34  | 0.30  | 0.26  | 0.24  | Blank group    |
|-------------------------------|-------|-------|-------|-------|-------|-------|-------|-------|-------|-------|-------|-------|----------------|
|                               |       |       |       |       |       |       |       |       |       |       |       |       | 0.053          |
| SiQDs-1                       | 0.047 | 0.044 | 0.048 | 0.047 | 0.053 | 0.055 | 0.058 | 0.148 | 0.239 | 0.366 |       |       | 0.06           |
|                               | 0.041 | 0.038 | 0.048 | 0.049 | 0.054 | 0.058 | 0.064 | 0.175 | 0.197 | 0.28  |       |       | 0.053          |
| SiQDs-2                       |       |       | 0.044 | 0.049 | 0.056 | 0.059 | 0.058 | 0.065 | 0.076 | 0.221 | 0.13  | 0.513 | Negative group |
|                               |       |       | 0.046 | 0.043 | 0.052 | 0.055 | 0.059 | 0.065 | 0.08  | 0.269 | 0.142 | 0.519 | 0.505          |
| SiQDs-3                       |       |       | 0.036 | 0.039 | 0.047 | 0.053 | 0.068 | 0.076 | 0.073 | 0.332 | 0.238 | 0.193 | 0.497          |
|                               |       |       | 0.045 | 0.053 | 0.057 | 0.061 | 0.069 | 0.071 | 0.087 | 0.34  | 0.527 | 0.21  | 0.5            |

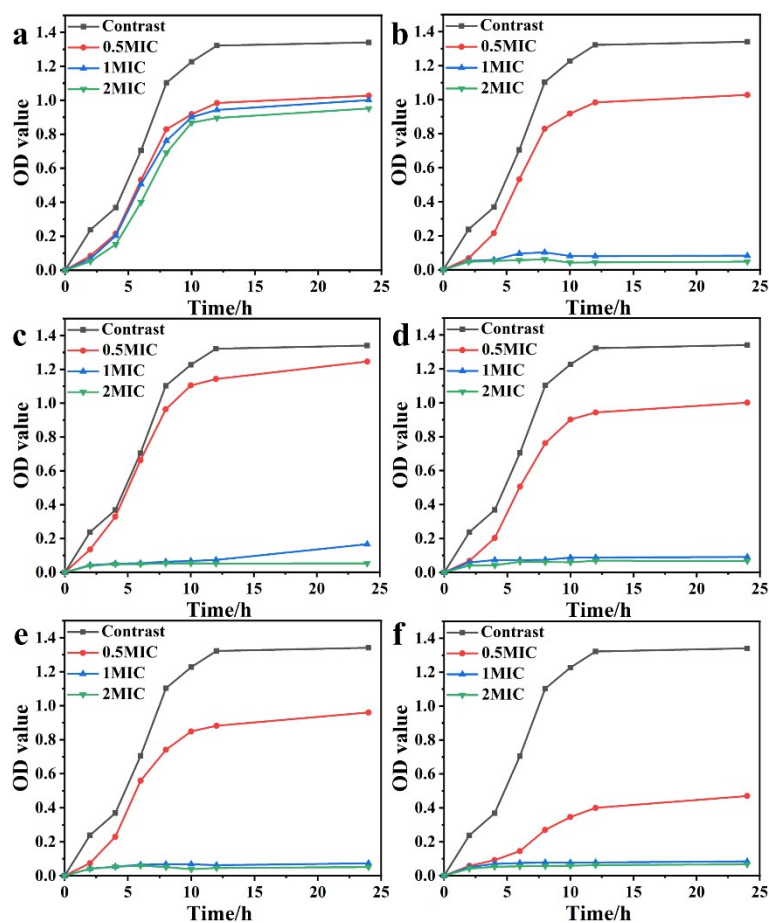

**Fig. S4** Antibacterial activities of SiQDs-1(a, b), SiQDs-2 (c, d), SiQDs-3 (e, f) against *E. coli* (a)(c)(e) and *S. aureus* (b)(d)(f).

**Table S3.** Comparison of the reported fluorescence probes with SiQDs-3 for TC detection

| Probes                       | Detection range<br>( $\mu\text{M}$ ) | LOD<br>( $\mu\text{M}$ ) | Ref. |
|------------------------------|--------------------------------------|--------------------------|------|
| CDs                          | 10-400                               | 6.0                      | 1    |
| waste printing paper         | 1-100                                | 0.48                     | 2    |
| CRSSs-NH <sub>2</sub> @N-CDs | 0.5-60                               | 0.39                     | 3    |
| UiO-66-NH <sub>2</sub>       | 0-37500                              | 0.449                    | 4    |
| N-CQDs                       | 0-30                                 | 0.344                    | 5    |

|         |        |       |           |
|---------|--------|-------|-----------|
| RBP-CDs | 0.5-30 | 0.36  | 6         |
| ZnO NRs | 2-120  | 1.27  | 7         |
| Cu-NCDs | 1-80   | 0.416 | 8         |
| SiQDs-3 | 0-1.2  | 0.318 | This work |

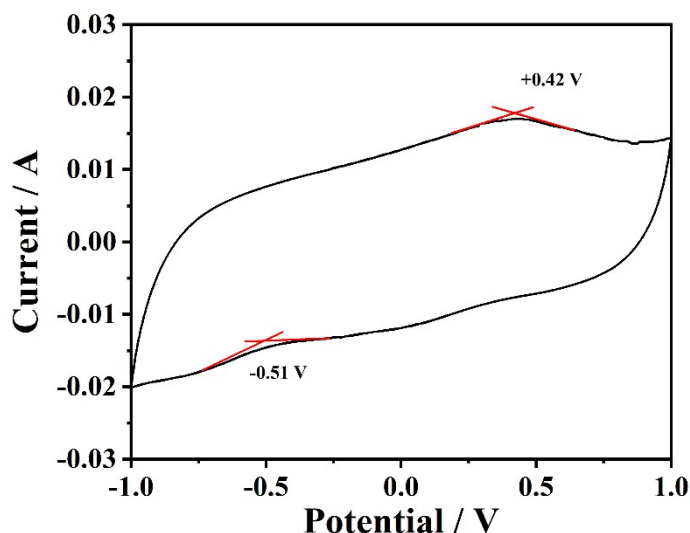

**Fig. S5.** Cyclic voltammograms of the SiQDs-3 in the solution state.

The HOMO and LUMO energy levels of SiQDs-3 could be estimated according to the empirical formula:

$$E_{HUMO} = -e(E_{ox} + 4.4)$$

$$E_{LUMO} = -e(E_{red} + 4.4)$$

Where  $E_{ox}$  and  $E_{red}$  are the onset of oxidation and reduction potential for SiQDs-3, respectively. The  $E_{ox}$  and  $E_{red}$  are determined to be 0.42 V and -0.51 V. The corresponding  $E_{HUMO}$  and  $E_{LUMO}$  were calculated to be -4.82 eV and -3.89 eV.

## Reference

1. Y. Yan, J. H. Liu, R. S. Li, Y. F. Li, C. Z. Huang and S. J. Zhen, Carbon dots synthesized at room temperature for detection of tetracycline hydrochloride, *Anal.*

- Chim. Acta.*, 2019, **1063**, 144-151.
2. J. Liu, T. Wang, Z. Wang, X. Zou, W. Wang, S. Zhang and Z. Gong, Ratiometric fluorescent probe for tetracycline detection based on waste printing paper, *Luminescence*, 2021, **36**, 1553-1560.
  3. M. Yuan, J. An, G. Zhang, Y. Hu, M. Luo, Y. Shi and Y. Liu, In-situ nitrogen-doped carbon dots for fluorescence sensing of tetracycline antibiotic, *Ceram. Int.*, 2022, **48**, 4047-4054.
  4. X. Wang and X. Wang, UiO-66-NH<sub>2</sub> based fluorescent sensing for detection of tetracyclines in milk, *RSC Adv.*, 2022, **12**, 23427-23436.
  5. C. Wang, Q. Sun, M. Yang, E. Liu, W. Xue and J. Fan, Preparation of highly luminescent nitrogen-doped carbon quantum dots and their detection of tetracycline antibiotics, *Colloid Surface A*, 2022, **653**, 129982.
  6. Y. Cao, X. Wang, H. Bai, P. Jia, Y. Zhao, Y. Liu, L. Wang, Y. Zhuang and T. Yue, Fluorescent detection of tetracycline in foods based on carbon dots derived from natural red beet pigment, *LWT*, 2022, **157**, 113100.
  7. Z. Zhou, K. Lu, X. Wei, T. Hao, Y. Xu, X. Lv and Y. Zhang, A mesoporous fluorescent sensor based on ZnO nanorods for the fluorescent detection and selective recognition of tetracycline, *RSC Adv.*, 2016, **6**, 71061-71069.
  8. Y. Wang, K. Zhang and Y. Du, Recent progress of carbon dot fluorescent probes for tetracycline detection, *New J. Chem.*, 2022, **46**, 20554-20560.
